# Supplementary material for: Demographics and Clinicopathologic Profile of Pulmonary Sarcomatoid Carcinoma with Survival Analysis and Genomic Landscape
Source: MDPI journal article supplement (doi:10.3390/cancers15092469), 2023-04-26
Supplement: s1 [file s1]

## Demographics and Clinicopathologic Profile of Pulmonary Sarcomatoid Carcinoma with Survival Analysis and Genomic Landscape

Asad Ullah<sup>1</sup>, Asim Ahmed<sup>2</sup>, Abdul Qahar Khan Yasinzai<sup>3</sup>, Kue Tylor Lee<sup>2</sup>, Israr Khan<sup>4</sup>, Bina Asif<sup>5</sup>, Imran Khan<sup>3</sup>, Bisma Tareen<sup>3</sup>, Saleh Heneidi<sup>6</sup>, Jaffar Khan<sup>7</sup>, Hina Khan<sup>8</sup>, Nabin R. Karki<sup>9</sup>, Jaydira Del Rivero<sup>10</sup>, Nagla Abdel Karim<sup>11</sup>

**Table S1:** Lymph node status and metastasis at the time of diagnosis of 5259 patients with pulmonary sarcomatoid carcinoma from the Surveillance, Epidemiology, and End Results (SEER) database, 2000 - 2018.

| Lymph node status (n = 5259)             |               |
|------------------------------------------|---------------|
| Unknown                                  | 3397 (64.6%)  |
| Known                                    | 1862 (35.4%)  |
| Lymph node status where known (n = 1862) |               |
| Positive                                 | 682 (36.6%)   |
| Negative                                 | 1180 (63.4%)  |
| SEER Metastasis (n = 5259)               | Frequency (%) |
| Unknown                                  | 2603(49.5%)   |
| Known                                    | 2656 (50.5%)  |
| Where metastasis were known (n = 2656)   |               |
| No metastasis                            | 1869 (70.4%)  |
| Bone metastasis only                     | 338 (12.7%)   |
| Brain metastasis only                    | 168 (6.3%)    |
| Liver metastasis only                    | 95 (3.6%)     |
| Bone + Brain metastases                  | 62 (2.3%)     |
| Bone + Liver metastases                  | 74 (2.8%)     |
| Brain + Liver metastases                 | 24 (0.9%)     |

|                                               |           |
|-----------------------------------------------|-----------|
| Combined metastases to bone, brain, and liver | 26 (1.0%) |
|-----------------------------------------------|-----------|

**Table S2:** Treatment characteristics of 5259 patients with pulmonary sarcomatoid carcinoma from the Surveillance, Epidemiology, and End Results (SEER) database, 2000-2018.

| <b>Treatment (n = 5259)</b>                                | <b>Frequency (%)</b> |
|------------------------------------------------------------|----------------------|
| Chemotherapy only                                          | 1141 (21.7%)         |
| Chemotherapy + Radiation                                   | 135 (2.6%)           |
| Chemotherapy + Surgery                                     | 387 (7.4%)           |
| Combination therapy (Chemotherapy + Radiation + Surgery)   | 272 (5.2%)           |
| Chemotherapy unknown   Neither Radiation nor Surgery       | 1988 (37.8%)         |
| Chemotherapy unknown   Radiation not done   Surgery done   | 1051 (20.0%)         |
| Chemotherapy unknown   Both Radiation and Surgery done     | 166 (3.2%)           |
| Chemotherapy unknown   Radiation done   Surgery not done   | 77 (1.5%)            |
| Both Chemotherapy and Surgery unknown   Radiation not done | 28 (0.5%)            |
| Chemotherapy done   Radiation not done   Surgery unknown   | 12 (0.2%)            |

|                                                           |          |
|-----------------------------------------------------------|----------|
| Both Chemotherapy and Radiation done  <br>Surgery unknown | 2 (0.0%) |
|-----------------------------------------------------------|----------|

### Survival analysis by different treatment modalities:

The overall observed 1-, 2-, 3-, 4-, and 5-year survivals were 33.9% (C.I 95%, 32.4-35.4), 23.7% (C.I 95%, 22.3-25.1), 19.5% (C.I 95%, 18.2-20.8), 17.3% (C.I 95%, 16.0-18.6) and 15.6% (C.I 95%, 14.4-16.9), respectively. Cause-specific 1-, 2-, 3-, 4-, and 5-year survivals were 36.4% (C.I 95%, 34.8-38.0), 26.6% (C.I 95%, 25.1-28.1), 22.8% (C.I 95%, 21.3-24.2), 21.0% (C.I 95%, 19.6-22.4) and 19.7% (C.I 95%, 18.3-21.1), respectively. For those treated with chemotherapy, the 1-, 2-, 3-, 4-, and 5-year survivals were 44.1% (C.I 95%, 41.5-46.6), 29.3% (C.I 95%, 26.9-31.8), 24.1% (C.I 95%, 21.8-26.5), 21.7% (C.I 95%, 19.5-24.1) and 19.9% (C.I 95%, 17.7-22.2). For those treated with surgery, the 1-, 2-, 3-, 4-, and 5-year survivals were 66.7% (C.I 95%, 64.0-69.2), 53.1% (C.I 95%, 50.3-55.9), 47.3% (C.I 95%, 44.4-50.0), 44.2% (C.I 95%, 41.4-47.1) and 41.7% (C.I 95%, 38.9-44.6), respectively. For those treated with radiation, the 1-, 2-, 3-, 4-, and 5-year survivals were 48.6% (C.I 95%, 43.8-53.2), 31.4% (C.I 95%, 26.9-36.0), 23.7% (C.I 95%, 19.5-28.2), 20.6% (C.I 95%, 16.6-25.0) and 19.1% (C.I 95%, 15.1-23.5). For those treated with a combination therapy (chemotherapy, surgery, and radiation combined), the 1-, 2-, 3-, 4-, and 5-year survivals were 65.7% (C.I 95%, 57.8-72.5), 42.8% (C.I 95%, 34.7-50.7), 33.3% (C.I 95%, 25.6-41.2), 28.0% (C.I 95%, 17.6-32.7), and 24.8% (C.I 95%, 17.6-32.7). (Table 3).

**Table S3:** Survival data of 5259 patients with Pulmonary sarcomatoid carcinoma from the Surveillance, Epidemiology, and End Results (SEER) database, 2000 - 2018.

| Survival | Overall<br>Observed<br>survival %<br>(C.I. 95%) | Cause<br>specific<br>survival%<br>(C.I. 95%) | Chemotherapy<br>% (C.I. 95%) | Surgery%<br>(C.I. 95%) | Radiation<br>%<br>(C.I. 95%) | Chemo +<br>Surgery +<br>Radiation -<br>Combined<br>treatment |
|----------|-------------------------------------------------|----------------------------------------------|------------------------------|------------------------|------------------------------|--------------------------------------------------------------|
|----------|-------------------------------------------------|----------------------------------------------|------------------------------|------------------------|------------------------------|--------------------------------------------------------------|

|         |                   |                   |                   |                   |                   | <b>%<br/>(C.I 95%)</b> |
|---------|-------------------|-------------------|-------------------|-------------------|-------------------|------------------------|
| 1 year  | 33.9% (32.4-35.4) | 36.4% (34.8-38.0) | 44.1% (41.5-46.6) | 66.7% (64.0-69.2) | 48.6% (43.8-53.2) | 65.7% (57.8-72.5)      |
| 2 years | 23.7% (22.3-25.1) | 26.6% (25.1-28.1) | 29.3% (26.9-31.8) | 53.1% (50.3-55.9) | 31.4% (26.9-36.0) | 42.8% (34.7-50.7)      |
| 3 years | 19.5% (18.2-20.8) | 22.8% (21.3-24.2) | 24.1% (21.8-26.5) | 47.3% (44.4-50.0) | 23.7% (19.5-28.2) | 33.3% (25.6-41.2)      |
| 4 years | 17.3% (16.0-18.6) | 21.0% (19.6-22.4) | 21.7% (19.5-24.1) | 44.2% (41.4-47.1) | 20.6% (16.6-25.0) | 28.0% (17.6-32.7)      |
| 5 years | 15.6% (14.4-16.9) | 19.7% (18.3-21.1) | 19.9% (17.7-22.2) | 41.7% (38.9-44.6) | 19.1% (15.1-23.5) | 24.8% (17.6-32.7)      |

### **Survival analysis by gender and race:**

The cumulative White race 1-, 2-, 3-, 4- and 5-year survivals were 36.5% (C.I 95%, 34.7-38.2), 26.7% (C.I 95%, 25.0-28.3), 22.9% (C.I 95%, 21.3-24.5), 21.2% (C.I 95%, 19.6-22.7), and 19.9% (C.I 95%, 18.4-21.5), respectively. For Black race, the 1-, 2-, 3-, 4-, and 5-year survivals were 37.8% (C.I 95%, 33.2-42.3), 26.7% (C.I 95%, 22.5-31.0), 23.1% (C.I 95%, 19.0-27.3), 20.5% (C.I 95%, 16.5-24.7), and 19.6% (C.I 95%, 15.7-23.9), respectively. For Asian or Pacific Islander race, the combined 1-, 2-, 3-, 4-, and 5-year survivals were 34.0% (C.I 95%, 27.4-40.7), 26.1% (C.I 95%, 19.9-32.6), 20.8% (C.I 95%, 15.0-27.3), 19.9% (C.I 95%, 14.2-26.4) and 18.0% (C.I 95%, 12.4-24.5). For American Indian or Alaska native race, the combined 1-, 2-, 3-, 4-, and 5-year survivals were 23.8% (C.I 95%, 8.7-43.1), 19.0% (C.I 95%, 5.9-37.7), 14.3% (C.I

95%, 3.6-32.1), 14.3% (C.I 95%, 3.6-32.1) and 9.5% (C.I 95%, 1.6-26.1).

The male gender had 1-, 2-, 3-, 4- and 5-year survival rates of 34.3% (C.I 95%, 32.3-36.3), 24.1% (C.I 95%, 22.3-26.0), 20.2% (C.I 95%, 18.4-22.0), 18.5% (C.I 95%, 16.7-20.3), and 17.2% (C.I 95%, 15.5-19.0), respectively. For female gender, the 1-, 2-, 3-, 4-, and 5-year survivals were 39.5% (C.I 95%, 37.0-41.9), 30.0% (C.I 95%, 27.7-32.4), 26.4% (C.I 95%, 24.1-28.8), 24.4% (C.I 95%, 22.2-26.8) and 23.1% (C.I 95%, 20.9-25.4), respectively. (Table 4).

**Table S4:** Survival by race and gender data of 5259 patients with pulmonary sarcomatoid carcinoma from the Surveillance, Epidemiology, and End Results (SEER) Database, 2000 – 2018

| <b>Survival</b> | <b>White%<br/>(C.I, 95%)</b> | <b>Black%<br/>(C.I, 95%)</b> | <b>Asian or Pacific<br/>Islander%<br/>(C.I, 95%)</b> | <b>American<br/>Indian or<br/>Alaska<br/>Native%<br/>(C.I, 95%)</b> |
|-----------------|------------------------------|------------------------------|------------------------------------------------------|---------------------------------------------------------------------|
| 1 year          | 36.5% (34.7-38.2)            | 37.8% (33.2-42.3)            | 34.0% (27.4-40.7)                                    | 23.8% (8.7-43.1)                                                    |
| 2 years         | 26.7% (25.0-28.3)            | 26.7% (22.5-31.0)            | 26.1% (19.9-32.6)                                    | 19.0% (5.9-37.7)                                                    |
| 3 years         | 22.9% (21.3-24.5)            | 23.1% (19.0-27.3)            | 20.8% (15.0-27.3)                                    | 14.3% (3.6-32.1)                                                    |
| 4 years         | 21.2% (19.6-22.7)            | 20.5% (16.5-24.7)            | 19.9% (14.2-26.4)                                    | 14.3% (3.6-32.1)                                                    |
| 5 years         | 19.9% (18.4-21.5)            | 19.6% (15.7-23.9)            | 18.0% (12.4-24.5)                                    | 9.5% (1.6-26.1)                                                     |

| <b>Survival</b> | <b>Male%<br/>(C.I, 95%)</b> | <b>Female%<br/>(C.I, 95%)</b> |
|-----------------|-----------------------------|-------------------------------|
| 1 year          | 34.3% (32.3-36.3)           | 39.5% (37.0-41.9)             |
| 2 years         | 24.1% (22.3-26.0)           | 30.0% (27.7-32.4)             |
| 3 years         | 20.2% (18.4-22.0)           | 26.4% (24.1-28.8)             |
| 4 years         | 18.5% (16.7-20.3)           | 24.4% (22.2-26.8)             |
| 5 years         | 17.2% (15.5-19.0)           | 23.1% (20.9-25.4)             |
